# Supplementary material for: Sanguinarine and chelerythrine: two natural products for mitochondria-imaging with aggregation-induced emission enhancement and pH-sensitive characteristics
Source: Royal Society of Chemistry journal article supplement (doi:10.1039/c7ra12920c), 2018-01-01
Supplement: c7ra12920c1.pdf [file c7ra12920c1.pdf]

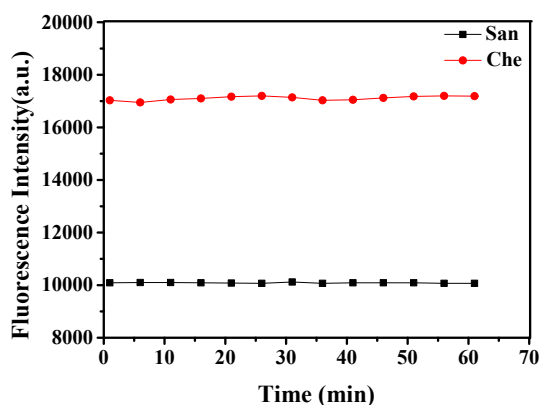

**Figure S1.** The time courses of fluorescence intensity of San (20  $\mu$ M) in CH<sub>3</sub>OH/H<sub>2</sub>O (2:8 v:v) mixture and Che (20  $\mu$ M) in CH<sub>3</sub>OH/H<sub>2</sub>O (1:9 v:v) mixture during 1 h. The fluorescence intensity is measured at  $\lambda_{\text{ex/em}} = 385/582$  nm of San and  $\lambda_{\text{ex/em}} = 380/570$  nm of Che.

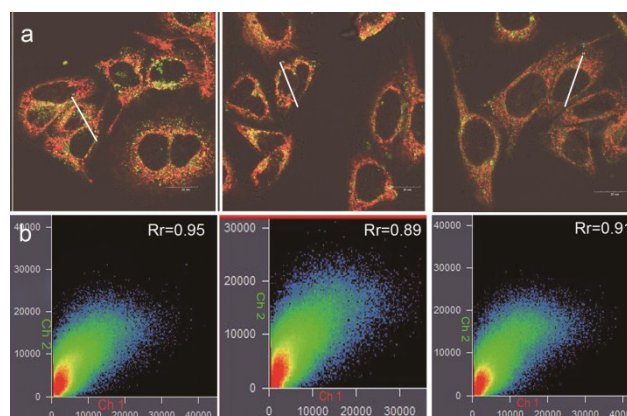

**Figure S2.** Co-localized images of tumor cells and the intensity scatter plot of the channel of Che and Mito-tracker. (a) co-localized images of RKO cell, HepG<sub>2</sub> cell and U<sub>87</sub> cell, respectively; (b) the intensity scatter plot of the channel of Che and Mito-tracker in regions of interest (ROI) in RKO cell, HepG<sub>2</sub> cell and U<sub>87</sub> cell, respectively.

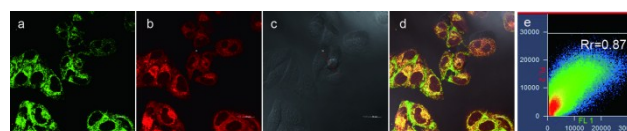

**Figure S3.** Co-localized images of HeLa cells stained with San (50  $\mu$ M) for 30 minutes and Mito Tracker Red (200 nM) for 15 minutes. (a) confocal image in green channel; (b) confocal image in red channel; (c) bright-field image; (d) merged image of (a), (b) and (c); (e) the intensity scatter plot of the channel of San and Mito-tracker. Scale bar = 20  $\mu$ m.
